# Supplementary figures and images for: Tauroursodeoxycholic acid: a bile acid that may be used for the prevention and treatment of Alzheimer’s disease
Source: Frontiers journal article supplement (doi:10.3389/fnins.2024.1348844), 2024-02-19

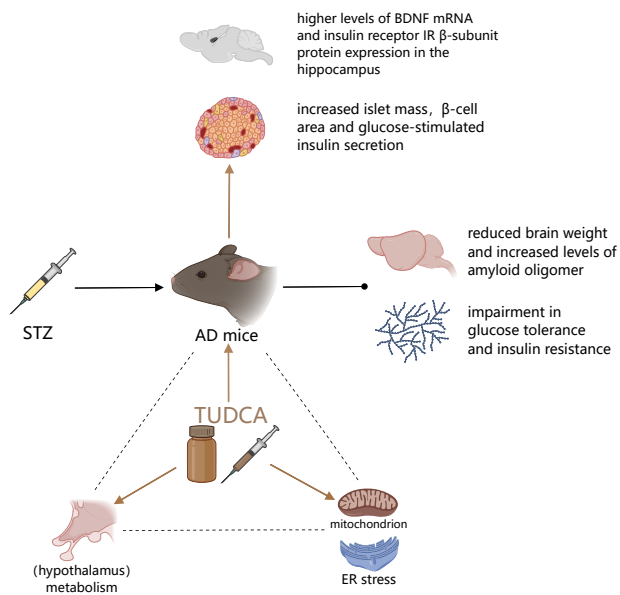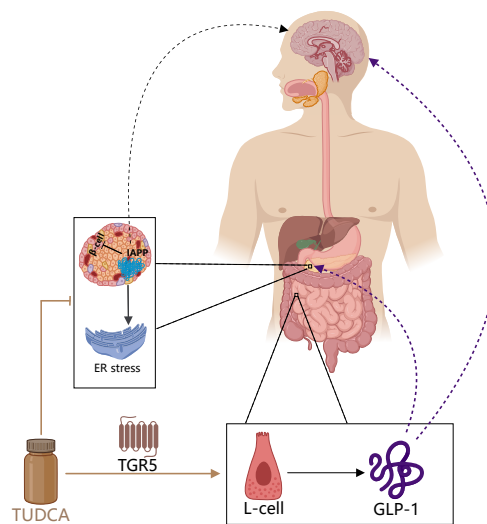

Supplement: Data_Sheet_7.PDF [file Data_Sheet_7.PDF]
